# Supplementary material for: Study of Innovative GO/PBI Composites as Possible Proton Conducting Membranes for Electrochemical Devices
Source: MDPI journal article supplement (doi:10.3390/membranes13040428), 2023-04-13
Supplement: s1 [file s1]

# Study of innovative GO/PBI composites as possible proton conducting membranes for electrochemical devices

Matteo Di Virgilio, Andrea Basso Peressut \*, Angelo Pontoglio, Saverio Latorrata \* and Giovanni Dotelli

Department of Chemistry, Materials and Chemical Engineering "Giulio Natta", Politecnico di Milano, Piazza Leonardo da Vinci 32, 20133 Milano, Italy; matteo.divirgilio@polimi.it (M.D.V.); angelo.pontoglio@mail.polimi.it (A.P.); giovanni.dotelli@polimi.it (G.D.)

\* Correspondence: andreastefano.basso@polimi.it (A.B.P), saverio.latorrata@polimi.it (S.L); Tel.: +39-02-2399-3190 (A.B.P. & S.L.)

## Supplementary materials

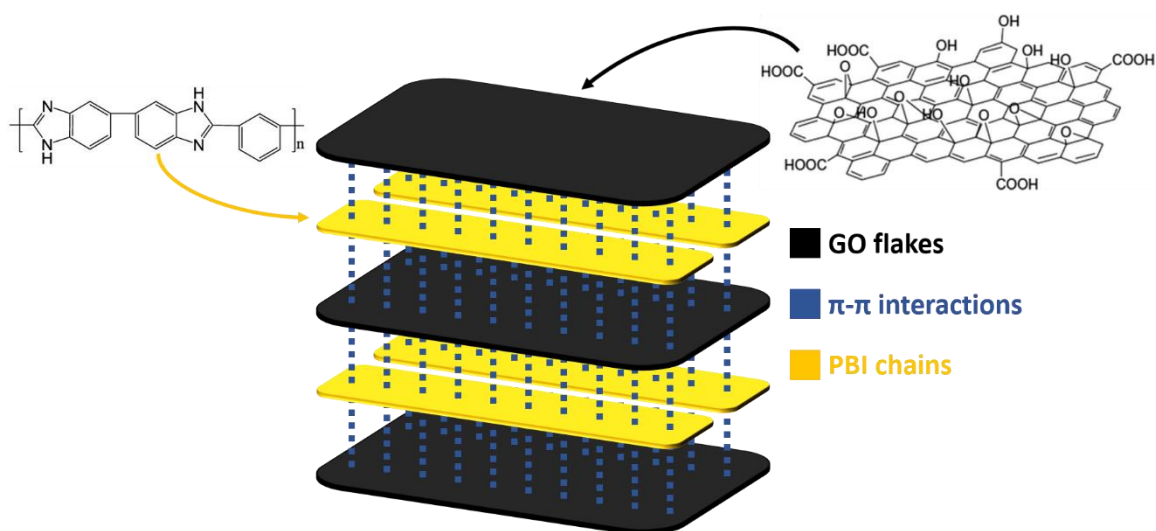

Figure S1. Sketch of the alternated stacked framework proposed to describe the structure of the GO/PBI X:Y composite membranes.

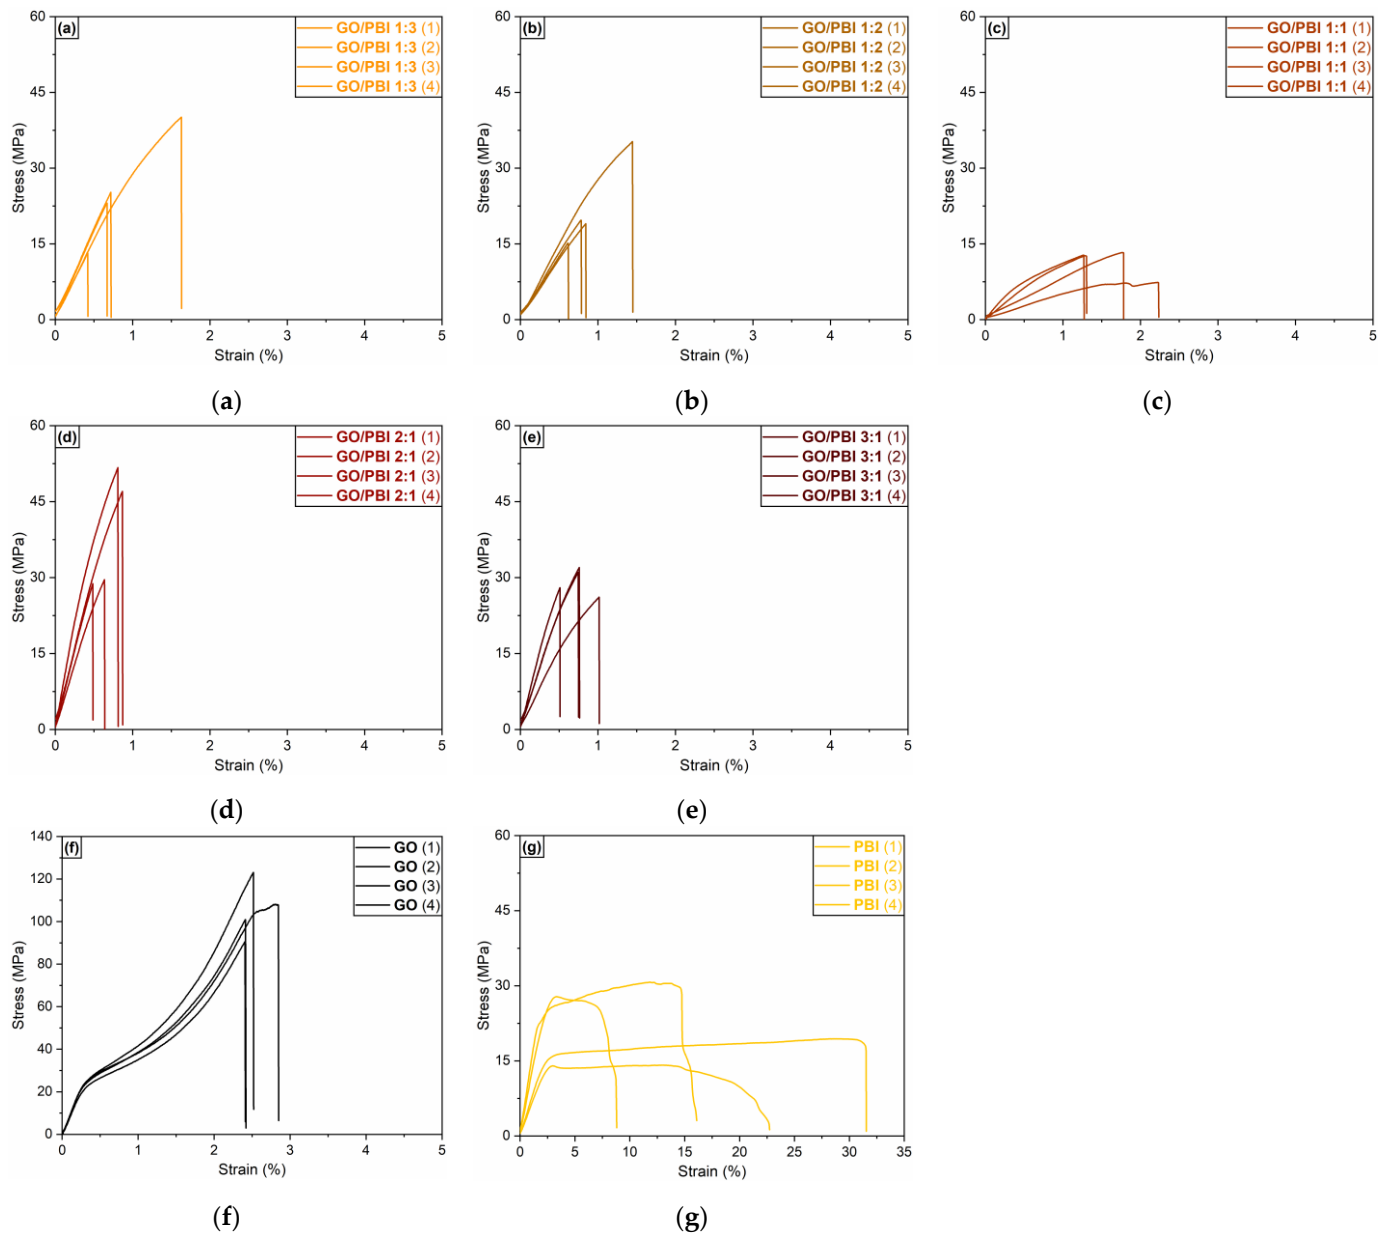

**Figure S2.** Stress-strain curves of (a) GO/PBI 1:3; (b) GO/PBI 1:2; (c) GO/PBI 1:1; (d) GO/PBI 2:1; (e) GO/PBI 3:1. For comparison purposes, the mechanical behaviors of (f) pure GO and (g) pure PBI are reported as well.
